# Supplementary material
Source: publisher figshare collection journal article supplement (https://gsajournals.figshare.com/ndownloader/files/15051551)
Supplement: Supplementary file 1 [file 15051551]

## Sheet: Table S5
Table S5. Enriched KEGG pathways identified in downregulated genes in cisplatin-treated versus vehicle-treated tg melanoma medaka.
Database:KEGG pathway	ID	fold enrichment; p-val
Fructose and mannose metabolism	ID:00051	O=2;E=0.02;R=104.17;rawP=0.0002
Amino sugar and nucleotide sugar metabolism	ID:00520	O=2;E=0.03;R=78.13;rawP=0.0003
Apoptosis	ID:04210	O=2;E=0.05;R=43.11;rawP=0.0010
Chemokine signaling pathway	ID:04062	O=2;E=0.10;R=19.84;rawP=0.0045
Metabolic pathways	ID:01100	O=2;E=0.60;R=3.32;rawP=0.1210
